# Supplementary material
Source: HighWire-hosted journal article supplement (https://bmjopen.bmj.com/content/9/8/e030253)
Supplement: inline-supplementary-material-1 [file inline-supplementary-material-1.pdf]

## Supplementary Materials

**Table S1. NOAC-related keywords and keyword combinations used for NOAC-related events.**

| <b>Characteristics</b>           | <b>Keywords</b>                                                                                                                                                                                                                                                                             |
|----------------------------------|---------------------------------------------------------------------------------------------------------------------------------------------------------------------------------------------------------------------------------------------------------------------------------------------|
| NOACs                            | Anticoagulant, anti coagulant, anti-coagulant, NOAC, non-vitamin K, coagulation, xarelto, rivaroxaban, rivaroxiban, rivaroxaban, pradaxa, dabigatran, dabigitran, eliquis, eliquis, apixaban, apixiban, DOAC, blood thinner, novel anti, thrombin, factor Xa, factor 10a, new anticoagulant |
| Professional status of attendees | Cardiologist, general practitioner, nurse, pharmacist, haematologist, hematologist, registrar.                                                                                                                                                                                              |
| Indications                      | Atrial, stroke, thrombosis, venous, embolism, VTE, NVAf, DVT, haematology, hematology, cardiology.                                                                                                                                                                                          |
| Trials                           | ROCKET, ARISTOLTE, RE-LY, AMPLIFY, EINSTEIN, RE-MEDY, RE-SONATE, RE-COVER.                                                                                                                                                                                                                  |

**Table S2. Timeline of NOAC Therapeutic Goods Administration (TGA) registration (market approval)**

| Approved indication                                                                                                                                                                                                                                                             | TGA registration date             |
|---------------------------------------------------------------------------------------------------------------------------------------------------------------------------------------------------------------------------------------------------------------------------------|-----------------------------------|
| <b>Rivaroxaban</b>                                                                                                                                                                                                                                                              |                                   |
| Prevention of venous thromboembolism in patients undergoing elective hip or total knee surgery (10 mg strength)                                                                                                                                                                 | November 2008                     |
| Approved additional strengths (15 mg and 20 mg) for prevention of venous thromboembolism in patients undergoing elective hip or total knee surgery                                                                                                                              | April 2012                        |
| Prevention of stroke and systemic embolism in patients with non-valvular atrial fibrillation and at least one additional risk factor for stroke; Treatment of acute deep vein thrombosis; Prevention of recurring deep vein thrombosis and pulmonary embolism (15 mg and 20 mg) | May 2012                          |
| Prevention of cardiovascular death, myocardial infarction and stent thrombosis in patients following acute coronary syndrome in combination with aspirin alone or with a thienopyridine (2.5 mg).                                                                               | Application withdrawn by sponsor* |
| Approved for treatment of pulmonary embolism (15 mg and 20 mg)                                                                                                                                                                                                                  | June 2013                         |
| <b>Apixaban</b>                                                                                                                                                                                                                                                                 |                                   |
| Prevention of venous thromboembolism in patients undergoing knee or hip replacement (2.5 mg)                                                                                                                                                                                    | July 2011                         |
| Prevention of stroke and systemic embolism in patients with non-valvular atrial fibrillation and at least one additional risk factor for stroke (5 mg)                                                                                                                          | May 2013                          |
| Treatment of acute deep vein thrombosis and pulmonary embolism; Prevention of recurring deep vein thrombosis and pulmonary embolism (2.5mg, 5 mg)                                                                                                                               | November 2015                     |
| <b>Dabigatran</b>                                                                                                                                                                                                                                                               |                                   |
| Prevention of venous thromboembolism in patients undergoing knee or hip replacement (75 mg, 110 mg)                                                                                                                                                                             | November 2008                     |
| Prevention of stroke and systemic embolism in patients with non-valvular atrial fibrillation and at least one additional risk factor for stroke (75 mg, 110 mg, 150 mg)                                                                                                         | April 2011                        |
| Treatment of acute deep vein thrombosis and pulmonary embolism; Prevention of recurring deep vein thrombosis and pulmonary embolism (75 mg, 110 mg, 150 mg)                                                                                                                     | August 2015                       |

\*The Advisory Committee on Prescription Medicines (advisory body to the TGA) recommended rejection as a positive benefit-risk profile had not been established, but the application was withdrawn by the sponsor before the TGA made a formal decision.

**Table S3. Timeline of major Pharmaceutical Benefits Advisory Committee (PBAC) recommendations and rejections for NOAC Pharmaceutical Benefits Scheme (PBS) subsidy**

| <b>PBAC decision</b>                                                                                                                                                                           | <b>PBAC decision date</b> | <b>PBS listing date</b> |
|------------------------------------------------------------------------------------------------------------------------------------------------------------------------------------------------|---------------------------|-------------------------|
| <b>Rivaroxaban</b>                                                                                                                                                                             |                           |                         |
| Recommended for the prevention of venous thromboembolism in patients undergoing knee or hip replacement                                                                                        | March 2009                | August 2009             |
| Recommended for the treatment of acute deep vein thrombosis without symptomatic pulmonary embolism, and prevention of recurrent venous thromboembolism                                         | March 2012                | December 2012           |
| Rejected application for prevention of stroke or systemic embolism in patients with non-valvular atrial fibrillation.                                                                          | March 2012                | -                       |
| Rejected application for prevention of stroke or systemic embolism in patients with non-valvular atrial fibrillation who are inadequately controlled on warfarin or not suitable for warfarin. | November 2012             | -                       |
| Recommended for prevention of stroke or systemic embolism in patients with non-valvular atrial fibrillation                                                                                    | March 2013                | August 2013             |
| Recommended for treatment of pulmonary embolism.                                                                                                                                               | March 2013                | August 2013             |
| <b>Apixaban</b>                                                                                                                                                                                |                           |                         |
| Recommended for the prevention of venous thromboembolism in patients undergoing knee or hip replacement                                                                                        | July 2011                 | January 2012            |
| Rejected application for prevention of stroke or systemic embolism in patients with non-valvular atrial fibrillation.                                                                          | November 2012             | -                       |
| Recommended for prevention of stroke or systemic embolism in patients with non-valvular atrial fibrillation                                                                                    | March 2013                | September 2013          |

Recommended for treatment of  
venous thromboembolism

March 2015

August 2015

**Dabigatran**

Recommended for the prevention  
of venous thromboembolism in  
patients undergoing knee or hip  
replacement

November 2009

April 2010

Recommended for prevention of  
stroke or systemic embolism in  
patients with non-valvular atrial  
fibrillation

March 2011\*

September 2013

---

\*Final decision deferred in response to the Therapeutic Goods Administration's Safety Advisory Alerts for dabigatran regarding bleeding-related adverse drug reactions (Oct 2011) and renal function monitoring requirements (Nov 2011). The March 2011 decision to recommend listing was affirmed in March 2013 following a PBAC review of anticoagulants in atrial fibrillation and provision of additional cost-effectiveness analyses by the manufacturer of dabigatran and the other NOACs.
